# Supplementary material for: Parenteral Nutrition: Current Use, Complications, and Nutrition Delivery in Critically Ill Patients
Source: MDPI journal article supplement (doi:10.3390/nu15214665), 2023-11-03
Supplement: s1 [file s1]

**Table S1.** Mechanical and infectious complications related to Parenteral Nutrition and central venous catheter evaluated during the study.

| <b>Mechanical complications</b>                |                                                                                                                                                                                                                                                                                                                                                                                                                                                                                                                                                                                                                                                                                                                 |
|------------------------------------------------|-----------------------------------------------------------------------------------------------------------------------------------------------------------------------------------------------------------------------------------------------------------------------------------------------------------------------------------------------------------------------------------------------------------------------------------------------------------------------------------------------------------------------------------------------------------------------------------------------------------------------------------------------------------------------------------------------------------------|
| <i>Related with catheter insertion</i>         | <i>Clinical considerations for diagnosis</i>                                                                                                                                                                                                                                                                                                                                                                                                                                                                                                                                                                                                                                                                    |
| Arterial puncture                              | Symptomatic                                                                                                                                                                                                                                                                                                                                                                                                                                                                                                                                                                                                                                                                                                     |
| Arterial laceration                            | If surgical repair is required                                                                                                                                                                                                                                                                                                                                                                                                                                                                                                                                                                                                                                                                                  |
| Gas embolism                                   | If there is clinical manifestation                                                                                                                                                                                                                                                                                                                                                                                                                                                                                                                                                                                                                                                                              |
| Catheter embolism                              | By radiological confirmation                                                                                                                                                                                                                                                                                                                                                                                                                                                                                                                                                                                                                                                                                    |
| Brachial plexus injury                         | If there are clinical symptoms                                                                                                                                                                                                                                                                                                                                                                                                                                                                                                                                                                                                                                                                                  |
| Pneumothorax / Pneumomediastinum               | With compatible clinical and radiology                                                                                                                                                                                                                                                                                                                                                                                                                                                                                                                                                                                                                                                                          |
| Hemothorax / Hemomediastinum                   |                                                                                                                                                                                                                                                                                                                                                                                                                                                                                                                                                                                                                                                                                                                 |
| Hydrothorax                                    | lipid-free PN in pleural space                                                                                                                                                                                                                                                                                                                                                                                                                                                                                                                                                                                                                                                                                  |
| Chylothorax                                    | Lesion of the thoracic duct                                                                                                                                                                                                                                                                                                                                                                                                                                                                                                                                                                                                                                                                                     |
| Cardiac lesion                                 | Clinic & diagnosis of pericardial tamponade                                                                                                                                                                                                                                                                                                                                                                                                                                                                                                                                                                                                                                                                     |
| Arrhythmias (with the removal of the catheter) | Significant hemodynamic instability                                                                                                                                                                                                                                                                                                                                                                                                                                                                                                                                                                                                                                                                             |
| Arterio-venous fistulae                        | Confirmed echography diagnosis                                                                                                                                                                                                                                                                                                                                                                                                                                                                                                                                                                                                                                                                                  |
| <i>Related with catheter maintenance</i>       | <i>Clinical considerations for diagnosis</i>                                                                                                                                                                                                                                                                                                                                                                                                                                                                                                                                                                                                                                                                    |
| Vein thrombosis                                | Confirmed echography diagnosis                                                                                                                                                                                                                                                                                                                                                                                                                                                                                                                                                                                                                                                                                  |
| Thrombophlebitis                               | Clinical diagnosis                                                                                                                                                                                                                                                                                                                                                                                                                                                                                                                                                                                                                                                                                              |
| <b>Infectious complications</b>                |                                                                                                                                                                                                                                                                                                                                                                                                                                                                                                                                                                                                                                                                                                                 |
| Catheter infection                             | <p>Catheter-related infection was defined according to:</p> <ul style="list-style-type: none"> <li>• Catheter tip colonization: significant growth of a microorganism (&gt;15 colony-forming units) from the catheter tip.</li> <li>• Catheter-related local infection: any sign of local infection (induration, erythema, heat, pain, purulent drainage) and catheter tip colonization criteria.</li> <li>• Catheter-related bloodstream infection: a positive blood culture obtained from a peripheral vein, and signs of systemic infection (fever, chills, and/or hypotension), with no apparent source of bacteremia except the catheter, and catheter tip colonization with the same organism.</li> </ul> |

**Table S2.** Mean caloric and protein requirements during parenteral nutrition (PN) delivery during ICU stay. Comparison between EN-PN subgroup and only PN subgroup (A), and EN-PN subgroup and PN-EN subgroup.

| A                         | Kcal/kg/day               |                        |                 | Protein g/kg/day          |                        |                 |
|---------------------------|---------------------------|------------------------|-----------------|---------------------------|------------------------|-----------------|
| Day                       | Only PN<br><i>n</i> = 112 | EN-PN<br><i>n</i> = 43 | <i>p</i> -Value | Only PN<br><i>n</i> = 112 | EN-PN<br><i>n</i> = 43 | <i>p</i> -Value |
| 1                         | 14.71 ± 8.58              | 6.52 ± 4.55            | <b>0.01</b>     | 0.73 ± 0.51               | 0.36 ± 0.27            | <b>0.01</b>     |
| 2                         | 19.93 ± 8.37              | 12.07 ± 7.56           | <b>0.01</b>     | 0.99 ± 0.60               | 0.64 ± 0.39            | <b>0.03</b>     |
| 3                         | 20.05 ± 7.70              | 16.31 ± 8.23           | <b>0.04</b>     | 1.00 ± 0.46               | 0.89 ± 0.48            | 0.09            |
| 4                         | 20.18 ± 7.34              | 15.89 ± 7.28           | <b>0.04</b>     | 1.03 ± 0.47               | 0.85 ± 0.38            | 0.23            |
| 5                         | 20.27 ± 7.37              | 17.65 ± 7.08           | 0.12            | 1.03 ± 0.47               | 0.91 ± 0.39            | 0.15            |
| 6                         | 20.10 ± 8.85              | 18.61 ± 7.98           | 0.09            | 1.03 ± 0.47               | 0.98 ± 0.42            | 0.35            |
| 7                         | 20.16 ± 9.64              | 16.66 ± 8.66           | 0.08            | 1.04 ± 0.51               | 0.95 ± 0.46            | 0.40            |
| Mean 1 <sup>st</sup> week | 13.62 ± 4.89              | 10.62 ± 5.09           | <b>0.01</b>     | 0.94 ± 0.42               | 0.79 ± 0.27            | <b>0.04</b>     |
| 8                         | 21.02 ± 10.10             | 16.27 ± 9.74           | <b>0.03</b>     | 1.06 ± 0.49               | 0.89 ± 0.46            | 0.18            |
| 9                         | 23.73 ± 8.04              | 16.22 ± 10.03          | <b>0.02</b>     | 1.08 ± 0.54               | 0.89 ± 0.45            | 0.50            |
| 10                        | 22.93 ± 9.48              | 17.32 ± 11.04          | 0.05            | 1.08 ± 0.60               | 0.90 ± 0.58            | 0.65            |
| 11                        | 25.03 ± 8.22              | 17.50 ± 8.95           | <b>0.01</b>     | 1.16 ± 0.60               | 0.87 ± 0.51            | 0.28            |
| 12                        | 24.79 ± 8.94              | 19.28 ± 6.15           | <b>0.01</b>     | 1.26 ± 0.53               | 1.01 ± 0.35            | 0.12            |
| 13                        | 25.61 ± 6.90              | 19.69 ± 6.82           | <b>0.01</b>     | 1.27 ± 0.50               | 1.04 ± 0.46            | 0.23            |
| 14                        | 21.98 ± 7.92              | 20.87 ± 8.60           | 0.78            | 1.09 ± 0.54               | 1.10 ± 0.41            | 0.65            |
| Mean 2 <sup>nd</sup> week | 19.27 ± 7.24              | 15.46 ± 5.31           | <b>0.03</b>     | 0.95 ± 0.43               | 0.36 ± 0.27            | 0.07            |

| B                         | Kcal/kg/day     |                 |                | Protein g/kg/day |                 |                |
|---------------------------|-----------------|-----------------|----------------|------------------|-----------------|----------------|
| Day                       | PN-EN<br>n = 74 | EN-PN<br>n = 43 | <i>p-Value</i> | PN-EN<br>n = 74  | EN-PN<br>n = 43 | <i>p-Value</i> |
| 1                         | 14.07 ± 8.07    | 6.52 ± 4.55     | <b>0.01</b>    | 0.72 ± 0.39      | 0.36 ± 0.27     | <b>0.01</b>    |
| 2                         | 19.91 ± 7.71    | 12.07 ± 7.56    | <b>0.01</b>    | 0.99 ± 0.40      | 0.64 ± 0.39     | <b>0.04</b>    |
| 3                         | 21.93 ± 7.32    | 16.31 ± 8.23    | 0.05           | 1.11 ± 0.43      | 0.89 ± 0.48     | 0.12           |
| 4                         | 22.42 ± 8.14    | 15.89 ± 7.28    | 0.06           | 1.14 ± 0.49      | 0.85 ± 0.38     | 0.18           |
| 5                         | 22.14 ± 8.54    | 17.65 ± 7.08    | 0.18           | 1.17 ± 0.54      | 0.91 ± 0.39     | 0.12           |
| 6                         | 22.56 ± 8.45    | 18.61 ± 7.98    | 0.10           | 1.20 ± 0.50      | 0.98 ± 0.42     | 0.30           |
| 7                         | 23.42 ± 8.19    | 16.66 ± 8.66    | 0.08           | 1.23 ± 0.52      | 0.95 ± 0.46     | 0.21           |
| Mean 1 <sup>st</sup> week | 16.84 ± 7.21    | 10.62 ± 5.09    | <b>0.03</b>    | 1.07 ± 0.37      | 0.79 ± 0.27     | <b>0.04</b>    |
| 8                         | 23.14 ± 8.37    | 16.27 ± 9.74    | 0.07           | 1.15 ± 0.54      | 0.89 ± 0.46     | 0.22           |
| 9                         | 23.10 ± 7.80    | 16.22 ± 10.03   | <b>0.04</b>    | 1.17 ± 0.50      | 0.89 ± 0.45     | 0.45           |
| 10                        | 23.42 ± 9.49    | 17.32 ± 11.04   | 0.09           | 1.19 ± 0.50      | 0.90 ± 0.58     | 0.65           |
| 11                        | 19.99 ± 8.32    | 17.50 ± 8.95    | <b>0.04</b>    | 1.02 ± 0.48      | 0.87 ± 0.51     | 0.68           |
| 12                        | 22.76 ± 9.13    | 19.28 ± 6.15    | 0.06           | 1.14 ± 0.50      | 1.01 ± 0.35     | 0.22           |
| 13                        | 23.20 ± 8.31    | 19.69 ± 6.82    | 0.09           | 1.14 ± 0.50      | 1.04 ± 0.46     | 0.53           |
| 14                        | 23.97 ± 11.23   | 20.87 ± 8.60    | 0.82           | 1.16 ± 0.63      | 1.10 ± 0.41     | 0.75           |
| Mean 2 <sup>nd</sup> week | 20.96 ± 5.74    | 15.46 ± 5.31    | <b>0.04</b>    | 1.08 ± 0.36      | 0.83 ± 0.28     | <b>0.04</b>    |

PN: parenteral nutrition; EN: enteral nutrition. Statistically significant *p*-values are written in bold.

**Table S3.** Laboratory data of the patients receiving parenteral nutrition admitted to the ICU: lipid profile (A), liver parameters (B), and blood proteins & C-reactive protein (C).

| A                                            |               | All patients<br>(n=186) | PN only<br>(n=112)  | PN-EN<br>(n=74)     | <i>p</i> -Values |
|----------------------------------------------|---------------|-------------------------|---------------------|---------------------|------------------|
| Triglycerides, mean $\pm$ SD<br>(mg/dL)      | Day 1         | 148.59 $\pm$ 114.32     | 134.12 $\pm$ 100.57 | 168.70 $\pm$ 129.68 | 0.14             |
|                                              | Day 3         | 186.19 $\pm$ 110.83     | 173.79 $\pm$ 97.43  | 203.95 $\pm$ 126.91 | 0.20             |
|                                              | Day 7         | 187.16 $\pm$ 87.84      | 178.10 $\pm$ 79.14  | 194.36 $\pm$ 94.59  | 0.44             |
|                                              | ICU discharge | 185.32 $\pm$ 101.40     | 190.34 $\pm$ 86.20  | 176.54 $\pm$ 124.69 | 0.54             |
| Hypertriglyceridemia (> 350 mg/dL), n (%)    |               | 16 (8.6)                | 6 (5.4)             | 10 (13.5)           | 0.24             |
| Cholesterol, mean $\pm$ SD<br>(mg/dL)        | Day 1         | 99.93 $\pm$ 47.11       | 102.36 $\pm$ 49.81  | 96.39 $\pm$ 43.23   | 0.53             |
|                                              | Day 3         | 99.21 $\pm$ 38.99       | 99.10 $\pm$ 35.90   | 99.41 $\pm$ 44.19   | 0.97             |
|                                              | Day 7         | 113.80 $\pm$ 42.13      | 107.33 $\pm$ 31.21  | 118.92 $\pm$ 48.89  | 0.26             |
|                                              | ICU discharge | 123.24 $\pm$ 48.13      | 119.24 $\pm$ 38.94  | 130.73 $\pm$ 61.84  | 0.28             |
| High cholesterol levels (> 200 mg/dL), n (%) |               | 8 (4.3)                 | 1 (0.9)             | 7 (9.5)             | 0.32             |
| HDL, mean $\pm$ SD<br>(mg/dL)                | Day 1         | 24.57 $\pm$ 19.17       | 24.79 $\pm$ 21.34   | 24.23 $\pm$ 15.75   | 0.90             |
|                                              | Day 3         | 34.09 $\pm$ 54.84       | 40.34 $\pm$ 65.01   | 22.96 $\pm$ 26.94   | 0.22             |
|                                              | Day 7         | 25.32 $\pm$ 32.52       | 22.41 $\pm$ 24.79   | 27.42 $\pm$ 37.43   | 0.59             |
|                                              | ICU discharge | 24.13 $\pm$ 12.58       | 24.60 $\pm$ 14.50   | 23.40 $\pm$ 9.13    | 0.74             |
| Low HDL levels (< 40 mg/dL), n (%)           |               | 92 (49.5)               | 52 (46.4)           | 40 (54.0)           | 0.27             |
| LDL, mean $\pm$ SD<br>(mg/dL)                | Day 1         | 50.33 $\pm$ 41.60       | 49.50 $\pm$ 46.13   | 51.48 $\pm$ 35.17   | 0.85             |
|                                              | Day 3         | 156.53 $\pm$ 437.63     | 176.59 $\pm$ 528.97 | 119.29 $\pm$ 176.40 | 0.63             |
|                                              | Day 7         | 71.08 $\pm$ 64.57       | 77.05 $\pm$ 86.66   | 66.27 $\pm$ 40.12   | 0.57             |
|                                              | ICU discharge | 70.96 $\pm$ 40.33       | 64.00 $\pm$ 32.56   | 82.31 $\pm$ 49.42   | 0.12             |
| High LDL levels (>190 mg/dL), n (%)          |               | 12 (6.4)                | 8 (7.1)             | 4 (5.4)             | 0.56             |

SD: standard deviation; HDL: high-density lipoprotein cholesterol; LDL: low-density lipoprotein cholesterol.

| B                                                 |               | All patients<br>(n=186) | PN only<br>(n=112) | PN-EN<br>(n=74) | <i>p</i> -Values |
|---------------------------------------------------|---------------|-------------------------|--------------------|-----------------|------------------|
| ALT/ GPT,<br>mean ± SD (IU/L)                     | Day 1         | 276.7 ± 101.4           | 325.9 ± 109.5      | 177.0 ± 88.9    | 0.63             |
|                                                   | Day 3         | 610.5 ± 183.3           | 540.5 ± 137.6      | 705.2 ± 254.6   | 0.25             |
|                                                   | Day 7         | 228.1 ± 88.1            | 145.1 ± 66.5       | 283.4 ± 107.7   | 0.36             |
|                                                   | ICU discharge | 694.3 ± 154.1           | 852.4 ± 173.4      | 289.8 ± 122.1   | 0.67             |
| AST/ GOT,<br>mean ± SD (IU/L)                     | Day 1         | 351.4 ± 130.5           | 403.5 ± 127.2      | 264.2 ± 135.2   | 0.89             |
|                                                   | Day 3         | 935.1 ± 232.9           | 374.4 ± 104.1      | 443.6 ± 142.4   | <b>0.03</b>      |
|                                                   | Day 7         | 123.1 ± 67.6            | 59.3 ± 49.6        | 157.1 ± 82.7    | 0.19             |
|                                                   | ICU discharge | 833.7 ± 183.2           | 964.7 ± 179.5      | 584.4 ± 189.1   | 0.95             |
| High transaminases<br>(AST or ALT>40 IU/L), n (%) |               | 108 (58.1)              | 58 (51.8)          | 50 (67.6)       | 0.68             |
| Bilirubin,<br>mean ± SD (mg/dL)                   | Day 1         | 2.47 ± 1.55             | 1.31 ± 1.25        | 3.62 ± 1.92     | 0.11             |
|                                                   | Day 3         | 2.46 ± 1.36             | 1.54 ± 1.20        | 3.42 ± 1.59     | 0.32             |
|                                                   | Day 7         | 2.23 ± 1.36             | 2.74 ± 1.32        | 1.64 ± 1.39     | 0.87             |
|                                                   | ICU discharge | 2.51 ± 1.22             | 2.67 ± 1.16        | 2.25 ± 1.31     | 0.72             |
| High bilirubin levels<br>(> 1.23 mg/dL), n (%)    |               | 77 (41.4)               | 46 (41.1)          | 31 (41.9)       | 0.70             |
| ALP,<br>mean ± SD (IU/L)                          | Day 1         | 119.8 ± 116.3           | 110.2 ± 94.4       | 133.3 ± 74.2    | 0.26             |
|                                                   | Day 3         | 114.6 ± 81.6            | 115.5 ± 75.8       | 113.3 ± 90.4    | 0.88             |
|                                                   | Day 7         | 167.6 ± 99.3            | 149.7 ± 62.7       | 180.8 ± 81.1    | 0.16             |
|                                                   | ICU discharge | 192.4 ± 154.1           | 173.2 ± 116.4      | 222.9 ± 97.7    | 0.10             |
| High ALP levels<br>(> 129 UI/L), n (%)            |               | 91 (48.9)               | 51 (45.5)          | 40 (54.0)       | <b>0.05</b>      |
| GGT,<br>mean ± SD (IU/L)                          | Day 1         | 210.5 ± 142.1           | 174.3 ± 131.2      | 252.6 ± 157.1   | 0.47             |
|                                                   | Day 3         | 139.1 ± 119.8           | 147.1 ± 111.7      | 165.5 ± 131.1   | 0.44             |
|                                                   | Day 7         | 264.1 ± 256.2           | 263.1 ± 130.8      | 250.9 ± 201.1   | 0.83             |
|                                                   | ICU discharge | 316.3 ± 271.9           | 372.2 ± 292.4      | 238.8 ± 195.1   | 0.39             |
| High GGT levels<br>(> 67 IU/L), n (%)             |               | 132 (71.0)              | 75 (67.0)          | 57 (77.0)       | 0.80             |
| Liver dysfunction, n (%)                          |               | 75 (40.3)               | 48 (42.9)          | 27 (36.5)       | 0.41             |

SD: standard deviation; ALT: alanine aminotransferase; GPT: glutamate-pyruvate transaminase; AST: aspartate aminotransferase; GOT: glutamic oxaloacetic transaminase; ALP: alkaline phosphatase; GGT: gamma-glutamyltransferase.

| C                                           |               | All patients<br>(n=186) | PN only<br>(n=112) | PN-EN<br>(n=74)    | <i>p-Values</i> |
|---------------------------------------------|---------------|-------------------------|--------------------|--------------------|-----------------|
| Prealbumin,<br>mean $\pm$ SD (mg/L)         | Day 1         | 117.5 $\pm$ 70.7        | 115.9 $\pm$ 72.9   | 119.9 $\pm$ 68.1   | 0.80            |
|                                             | Day 3         | 108.4 $\pm$ 64.5        | 106.1 $\pm$ 68.7   | 112.9 $\pm$ 55.9   | 0.64            |
|                                             | Day 7         | 144.7 $\pm$ 68.7        | 149.1 $\pm$ 69.8   | 140.9 $\pm$ 68.8   | 0.65            |
|                                             | ICU discharge | 164.9 $\pm$ 77.8        | 171.8 $\pm$ 81.2   | 150.7 $\pm$ 69.8   | 0.27            |
| Low prealbumin levels, < 200 mg/L, n (%)    |               | 117 (62.9)              | 72 (64.3)          | 45 (60.8)          | 0.43            |
| Albumin,<br>$\pm$ SD (g/L)                  | Day 1         | 2.54 $\pm$ 0.65         | 2.51 $\pm$ 0.62    | 2.58 $\pm$ 0.71    | 0.50            |
|                                             | Day 3         | 2.39 $\pm$ 0.52         | 2.40 $\pm$ 0.52    | 2.37 $\pm$ 0.51    | 0.74            |
|                                             | Day 7         | 2.42 $\pm$ 0.57         | 2.45 $\pm$ 0.55    | 2.39 $\pm$ 0.59    | 0.62            |
|                                             | ICU discharge | 2.53 $\pm$ 0.63         | 2.52 $\pm$ 0.64    | 2.54 $\pm$ 0.62    | 0.87            |
| Low albumin levels, < 30 g/L, n (%)         |               | 175 (94.1)              | 107 (95.5)         | 68 (91.9)          | 0.89            |
| C-reactive protein,<br>mean $\pm$ SD (mg/L) | Day 1         | 173.6 $\pm$ 144.2       | 171.2 $\pm$ 133.5  | 177.3 $\pm$ 160.1  | 0.79            |
|                                             | Day 3         | 152.8 $\pm$ 128.6       | 168.8 $\pm$ 135.6  | 128.09 $\pm$ 113.9 | 0.07            |
|                                             | Day 7         | 144.7 $\pm$ 90.6        | 120.5 $\pm$ 97.8   | 129.62 $\pm$ 81.3  | 0.10            |
|                                             | ICU discharge | 104.2 $\pm$ 109.9       | 119.4 $\pm$ 123.7  | 76.07 $\pm$ 71.2   | <b>0.03</b>     |

SD: standard deviation.
